# Supplementary material for: Stigma and Discrimination towards People Living with HIV in the Context of Families, Communities, and Healthcare Settings: A Qualitative Study in Indonesia
Source: MDPI journal article supplement (doi:10.3390/ijerph18105424), 2021-05-19
Supplement: s1 [file s1]

**Table S1.** Consolidated criteria for reporting qualitative studies (COREQ): 32-item checklist.

| No                                             | Item                                     | Guide questions/description                                                                                                                              |   |
|------------------------------------------------|------------------------------------------|----------------------------------------------------------------------------------------------------------------------------------------------------------|---|
| <b>Domain 1: Research team and reflexivity</b> |                                          |                                                                                                                                                          |   |
| Personal Characteristics                       |                                          |                                                                                                                                                          |   |
| 1.                                             | Interviewer/facilitator                  | Which author/s conducted the interview or focus group?                                                                                                   | ✓ |
| 2                                              | Credentials                              | What were the researcher's credentials? E.g. PhD, MD                                                                                                     | ✓ |
| 3                                              | Occupation                               | What was their occupation at the time of the study?                                                                                                      | ✓ |
| 4                                              | Gender                                   | Was the researcher male or female?                                                                                                                       | ✓ |
| 5                                              | Experience and training                  | What experience or training did the researcher have?                                                                                                     | ✓ |
| Relationship with participants                 |                                          |                                                                                                                                                          |   |
| 6                                              | Relationship established                 | Was a relationship established prior to study commencement?                                                                                              | ✓ |
| 7                                              | Participant knowledge of the interviewer | What did the participants know about the researcher? e.g. personal goals, reasons for doing the research                                                 | ✓ |
| 8                                              | Interviewer characteristics              | What characteristics were reported about the interviewer/facilitator? e.g. Bias, assumptions, reasons and interests in the research topic                | ✓ |
| <b>Domain 2: study design</b>                  |                                          |                                                                                                                                                          |   |
| Theoretical framework                          |                                          |                                                                                                                                                          |   |
| 9                                              | Methodological orientation and Theory    | What methodological orientation was stated to underpin the study? e.g. grounded theory, discourse analysis, ethnography, phenomenology, content analysis | ✓ |
| Participant selection                          |                                          |                                                                                                                                                          |   |
| 10                                             | Sampling                                 | How were participants selected? e.g. purposive, convenience, consecutive, snowball                                                                       | ✓ |
| 11                                             | Method of approach                       | How were participants approached? e.g. face-to-face, telephone, mail, email                                                                              | ✓ |
| 12                                             | Sample size                              | How many participants were in the study?                                                                                                                 | ✓ |
| 13                                             | Non-participation                        | How many people refused to participate or dropped out? Reasons?                                                                                          | ✓ |
| Setting                                        |                                          |                                                                                                                                                          |   |
| 14                                             | Setting of data collection               | Where was the data collected? e.g. home, clinic, workplace                                                                                               | ✓ |
| 15                                             | Presence of non-participants             | Was anyone else present besides the participants and researchers?                                                                                        | ✓ |
| 16                                             | Description of sample                    | What are the important characteristics of the sample? e.g. demographic data, date                                                                        | ✓ |
| Data collection                                |                                          |                                                                                                                                                          |   |
| 17                                             | Interview guide                          | Were questions, prompts, guides provided by the authors? Was it pilot tested?                                                                            | ✓ |
| 18                                             | Repeat interviews                        | Were repeat interviews carried out? If yes, how many?                                                                                                    | ✓ |
| 19                                             | Audio/visual recording                   | Did the research use audio or visual recording to collect the data?                                                                                      | ✓ |
| 20                                             | Field notes                              | Were field notes made during and/or after the interview or focus group?                                                                                  | ✓ |
| 21                                             | Duration                                 | What was the duration of the interviews or focus group?                                                                                                  | ✓ |
| 22                                             | Data saturation                          | Was data saturation discussed?                                                                                                                           | ✓ |
| 23                                             | Transcripts returned                     | Were transcripts returned to participants for comment and/or correction?                                                                                 | ✓ |
| <b>Domain 3: analysis and findings</b>         |                                          |                                                                                                                                                          |   |
| Data analysis                                  |                                          |                                                                                                                                                          |   |
| 24                                             | Number of data coders                    | How many data coders coded the data?                                                                                                                     | ✓ |
| 25                                             | Description of the coding tree           | Did authors provide a description of the coding tree?                                                                                                    | ✓ |
| 26                                             | Derivation of themes                     | Were themes identified in advance or derived from the data?                                                                                              | ✓ |
| 27                                             | Software                                 | What software, if applicable, was used to manage the data?                                                                                               | ✓ |
| 28                                             | Participant checking                     | Did participants provide feedback on the findings?                                                                                                       | ✓ |
| Reporting                                      |                                          |                                                                                                                                                          |   |

|    |                              |                                                                                                                                   |   |
|----|------------------------------|-----------------------------------------------------------------------------------------------------------------------------------|---|
| 29 | Quotations presented         | Were participant quotations presented to illustrate the themes / findings? Was each quotation identified? e.g. participant number | ✓ |
| 30 | Data and findings consistent | Was there consistency between the data presented and the findings?                                                                | ✓ |
| 31 | Clarity of major themes      | Were major themes clearly presented in the findings?                                                                              | ✓ |
| 32 | Clarity of minor themes      | Is there a description of diverse cases or discussion of minor themes?                                                            | ✓ |
